# Supplementary material for: Panenteric capsule endoscopy versus ileocolonoscopy plus magnetic resonance enterography in Crohn’s disease: a multicentre, prospective study
Source: PubMed Central journal article supplement — BMJ Open Gastroenterol. 2020 Jun 3;7(1):e000365. doi: 10.1136/bmjgast-2019-000365 (PMC7282309; doi:10.1136/bmjgast-2019-000365), 2020-06-03
Supplement: bmjgast-2019-000365supp001.pdf [file bmjgast-2019-000365supp001.pdf]

## SUPPLEMENTAL TABLES

**Supplemental Table 1.** Study Inclusion and Exclusion Criteria

| <b>Inclusion Criteria</b>                                                                                                                                                                                                                                                                                                                                                                                                                                                                                                                                                          | <b>Exclusion Criteria</b>                                                                                                                                                                                                                                                                                                                                                                                                                                                                                                                                                                                                                                                                                                                                                                                                                                                                                                                                                                                                                                                                                                             |
|------------------------------------------------------------------------------------------------------------------------------------------------------------------------------------------------------------------------------------------------------------------------------------------------------------------------------------------------------------------------------------------------------------------------------------------------------------------------------------------------------------------------------------------------------------------------------------|---------------------------------------------------------------------------------------------------------------------------------------------------------------------------------------------------------------------------------------------------------------------------------------------------------------------------------------------------------------------------------------------------------------------------------------------------------------------------------------------------------------------------------------------------------------------------------------------------------------------------------------------------------------------------------------------------------------------------------------------------------------------------------------------------------------------------------------------------------------------------------------------------------------------------------------------------------------------------------------------------------------------------------------------------------------------------------------------------------------------------------------|
| <ol style="list-style-type: none"> <li>1. Subject has provided informed consent.</li> <li>2. Subject is <math>\geq 18</math> years of age.</li> <li>3. Subject is willing and able to comply with all aspects of the treatment and evaluation schedule.</li> <li>4. Subject has known Crohn's disease and a recent history (within last 2 years) of mucosal disease (based on radiologic, endoscopic, or histologic evidence) OR known Crohn's disease and active disease, based on clinical judgment based on symptoms, laboratory data or other clinical information.</li> </ol> | <ol style="list-style-type: none"> <li>1. Subject has indeterminate, ulcerative, or antibiotic-associated colitis.</li> <li>2. Subject has stool positive for ova and parasite or for <i>Clostridium difficile</i> toxins within 3 months prior to enrollment.</li> <li>3. Subject with other known infectious cause of abdominal symptoms.</li> <li>4. Subject with clinical evidence of renal disease within the past 6 months, defined as estimated glomerular filtration rate (GFR) outside of the normal reference range.</li> <li>5. Subject with known history of intestinal obstruction or current obstructive symptoms, such as severe abdominal pain with accompanying nausea or vomiting, based on investigator judgment.</li> <li>6. Subject with a diagnosis of gastroparesis or small bowel or large bowel dysmotility.</li> <li>7. Subject with suspected or known bowel obstruction, stricture (defined as unequivocal proximal upstream dilation <math>\geq 2.5</math> cm), or fistula.</li> <li>8. Subject has used non-steroidal anti-inflammatory drugs including aspirin, two times or more per week,</li> </ol> |

|  |                                                                                                                                                                                                                                                                                                                                                                                                                                                                                                                                                                                                                                                                                                                                                                                                                                                                                                                                                                                                                                                                                                                                                                                         |
|--|-----------------------------------------------------------------------------------------------------------------------------------------------------------------------------------------------------------------------------------------------------------------------------------------------------------------------------------------------------------------------------------------------------------------------------------------------------------------------------------------------------------------------------------------------------------------------------------------------------------------------------------------------------------------------------------------------------------------------------------------------------------------------------------------------------------------------------------------------------------------------------------------------------------------------------------------------------------------------------------------------------------------------------------------------------------------------------------------------------------------------------------------------------------------------------------------|
|  | <p>during the 4 weeks preceding enrollment. Low dose aspirin regimens (<math>\leq 100</math> mg daily) are acceptable and not exclusionary.</p> <p>9. Subject suffers from any condition, such as swallowing problems, that precludes compliance with study and/or device instructions.</p> <p>10. Subject with cardiac pacemaker or other implanted electromedical device.</p> <p>11. Subject has any allergy or other known contraindication to the medications used in the study.</p> <p>12. Subject is pregnant (documented by a positive pregnancy test) or is actively breast-feeding.</p> <p>13. Subject is considered to be part of a vulnerable population (e.g. prisoners or those without sufficient mental capacity).</p> <p>14. Subject has known contraindication to MRE or IC.</p> <p>15. Subject has participated in a drug or device research study within 30 days of enrollment that may interfere with the subject's safety or ability to participate in the study.</p> <p>16. Subject has any medical condition that would make it unsafe for them to participate, per the Investigator's discretion</p> <p>17. Subject with ileostomy or colostomy, history of</p> |
|--|-----------------------------------------------------------------------------------------------------------------------------------------------------------------------------------------------------------------------------------------------------------------------------------------------------------------------------------------------------------------------------------------------------------------------------------------------------------------------------------------------------------------------------------------------------------------------------------------------------------------------------------------------------------------------------------------------------------------------------------------------------------------------------------------------------------------------------------------------------------------------------------------------------------------------------------------------------------------------------------------------------------------------------------------------------------------------------------------------------------------------------------------------------------------------------------------|

|  |                                                                                          |
|--|------------------------------------------------------------------------------------------|
|  | total or subtotal colectomy (including those with ileosigmoidostomy, and ileorectostomy) |
|--|------------------------------------------------------------------------------------------|

**Supplemental Table 2.** Protocol for MRE Imaging parameters

| <b>Sequence</b>              | <b>T2 Steady State Free Precession (Fisp,FFE,MPGR) w/fatsat</b> | <b>T2 Steady State Free Precession (Fisp,FFE,MPGR) wo/fatsat</b> | <b>T2 Single Shot FSE 2D (SSFSE) w/fatsat</b> | <b>T2 Single Shot FSE 2D (SSFSE) wo/fatsat</b> | <b>Optional SSFP, SSFSE or Balanced SSFP (True Fisp) with or without fat sat</b> | <b>GRE T1 weighted Dynamic series, (Thrive, Vibe, Lava) One pre, 2 post – 45 seconds and 180 seconds</b> | <b>T1 GRE</b>                                             |
|------------------------------|-----------------------------------------------------------------|------------------------------------------------------------------|-----------------------------------------------|------------------------------------------------|----------------------------------------------------------------------------------|----------------------------------------------------------------------------------------------------------|-----------------------------------------------------------|
| <b>2D/3D</b>                 | 2D                                                              | 2D                                                               | 2D                                            | 2D                                             | 2D                                                                               | 3D                                                                                                       | 2D or 3D                                                  |
| <b>Orientation</b>           | Coronal                                                         | Coronal                                                          | Coronal                                       | Coronal                                        | Axial                                                                            | Coronal                                                                                                  | Axial                                                     |
| <b>Matrix</b>                | 256 x 192 or higher preferred                                   | 256 x 192 or higher preferred                                    | 256 x 192 or higher preferred                 | 256 x 192 or higher preferred                  | 256 x 192 or higher preferred                                                    | 256 x 192 or higher preferred                                                                            | 256 x 192 or higher preferred                             |
| <b>Slice thickness</b>       | < 5 mm preferred                                                | < 5 mm preferred                                                 | < 5 mm preferred                              | < 5 mm preferred                               | 7-8 mm                                                                           | 3mm or less                                                                                              | 7-8 mm 2D<br>4 mm 3D                                      |
| <b>Slice Gap (preferred)</b> | < 1 mm                                                          | < 1 mm                                                           | < 1 mm                                        | < 1 mm                                         | 1 to 2 mm                                                                        | 0 mm                                                                                                     | 2 to 2 mm 2D<br>0mm 3D                                    |
| <b>Coverage</b>              | fundus of stomach to anus                                       | fundus of stomach to anus                                        | fundus of stomach to anus                     | fundus of stomach to anus                      | –                                                                                | small bowel (including duodenum), colon, rectum, and anus                                                | small bowel (including duodenum), colon, rectum, and anus |
| <b>FOV</b>                   | 380-420                                                         | 380-420                                                          | 380-420                                       | 380-420                                        | 340-380                                                                          | 380-420                                                                                                  | 340-380                                                   |

|                                                                                                                                                          |     |    |     |    |        |     |     |
|----------------------------------------------------------------------------------------------------------------------------------------------------------|-----|----|-----|----|--------|-----|-----|
| <b>Adjust for coverage</b>                                                                                                                               |     |    |     |    |        |     |     |
| <b>Fat Sat</b>                                                                                                                                           | yes | no | yes | no | either | yes | yes |
| In addition, do at least one of the above pulse sequences (true-FISP, SSFSE) in the axial plane. This may be done in place of one of the coronal series. |     |    |     |    |        |     |     |

**Supplemental Table 3.** Study Schedule and complete bowel preparation procedure

| Day                                 | Time                      | Procedure                                                                                                                                                |
|-------------------------------------|---------------------------|----------------------------------------------------------------------------------------------------------------------------------------------------------|
| Day (-30)                           | Any                       | Baseline visit [laboratory test, concomitant medications, patient satisfaction questionnaire, AEs, Study deviations]                                     |
| Day (-30 to -1)                     | 4 hrs prior to MRE        | Water only                                                                                                                                               |
|                                     | As defined by radiologist | Ingest 1L to 1.8L bowel prep solution                                                                                                                    |
|                                     | As scheduled              | MRE procedure                                                                                                                                            |
|                                     | Any                       | Patency capsule [if needed]                                                                                                                              |
| Day (-1)                            | All day                   | Clear liquid diet                                                                                                                                        |
|                                     | 13 to 15 hrs prior to CE  | Ingest 2 L PEG electrolyte lavage solution                                                                                                               |
| Day (0)                             | 1 to 3 hrs prior to CE    | Ingest 2 L PEG electrolyte lavage solution                                                                                                               |
|                                     | As scheduled              | CE ingestion with sip of water                                                                                                                           |
|                                     | 1 hr after CE ingestion   | Take 10 mg Metoclopramide or 250mg oral Erythromycin, Alert 0*                                                                                           |
|                                     | Upon SB detection         | 0.5 bottle (88 mL) of sodium sulfate, potassium sulfate, and magnesium sulfate solution diluted to per packet instructions followed by 1L water, Alert 1 |
|                                     | 3 hrs later               | 0.5 bottle (88 mL) of sodium sulfate, potassium sulfate, and magnesium sulfate solution diluted to per packet instructions followed by 1L water, Alert 2 |
|                                     | 2 hrs later               | 10 mg Bisacodyl suppository or 250 mg oral erythromycin, Alert 3                                                                                         |
| End of CE Procedure/Excretion of CE |                           |                                                                                                                                                          |

| Day (0 to 1)                                                                                                                                                                                    | Prior to IC                     | NPO or clear liquid diet |
|-------------------------------------------------------------------------------------------------------------------------------------------------------------------------------------------------|---------------------------------|--------------------------|
|                                                                                                                                                                                                 | After CE completion or Next day | IC procedure             |
| PEG, polyethylene glycol; NPO, nothing by mouth; IC, ileocolonoscopy; CE, capsule endoscopy; MRE, magnetic resonance enterography; SB, small bowel.<br>*Note: Not all patients received Alert 0 |                                 |                          |

**Supplemental Table 4.** Summary of Baseline Demographics and Clinical Characteristics

|                                                        | Enrolled<br>(N=119) |
|--------------------------------------------------------|---------------------|
| Age (years), mean ( $\pm$ SD)                          | 39.8 (12.26)        |
| Gender, n(%)                                           |                     |
| Female                                                 | 71 (60%)            |
| Male                                                   | 48 (40%)            |
| BMI (kg/m <sup>2</sup> ), mean ( $\pm$ SD)             | 29.0 (7.53)         |
| Montreal Classification (age of onset, years), n(%)    |                     |
| A1 (<16)                                               | 10 (8%)             |
| A2 (16-40)                                             | 91 (77%)            |
| A3 (>40)                                               | 18 (15%)            |
| Disease behaviour, n(%)                                |                     |
| B1 – Inflammatory                                      | 91 (77%)            |
| B2 – Stricturing                                       | 18 (15%)            |
| B3 – Penetrating                                       | 10 (8%)             |
| Disease Location, n(%)                                 |                     |
| L1 – Ileum                                             | 38 (32%)            |
| L2 – Colon                                             | 18 (15%)            |
| L3 – Ileocolon                                         | 63 (53%)            |
| Concomitant Crohn's-related Medications $\geq$ 1, n(%) | 100 (84%)           |
| Anti-inflammatory/5-ASA drugs                          | 16 (16%)            |
| Steroids                                               | 27 (27%)            |
| Biologics                                              | 72 (72%)            |



|                                                                                               |                 |
|-----------------------------------------------------------------------------------------------|-----------------|
| Immunomodulators                                                                              | 39 (39%)        |
| Other (Symptomatic relief, nutritional/vitamin supplements)                                   | 49 (49%)        |
| Laboratory parameters, mean ( $\pm$ SD)                                                       |                 |
| Albumin (g/dL)                                                                                | 4.29 (0.38)     |
| CRP (mg/dL)                                                                                   | 4.19 (6.20)     |
| Hemoglobin (g/dL)                                                                             | 13.34 (1.69)    |
| Fecal calprotectin ( $\mu$ g/g)                                                               | 268.39 (349.29) |
| 5-ASA, aminosalicylate; BMI, body mass index; CRP, C-reactive protein; SD, standard deviation |                 |

**Supplemental Table 5.** Summary of Discrepant Reads Between Modalities and Consensus Panel Determination

| Segment                     | Modality evaluation* |             | Consensus Panel Decision† |                    |                   |                      |                       |                       |
|-----------------------------|----------------------|-------------|---------------------------|--------------------|-------------------|----------------------|-----------------------|-----------------------|
|                             | Agreement            | Discrepancy | Agreement with CE         | Agreement with MRE | Agreement with IC | Agreement with CE+IC | Agreement with CE+MRE | Agreement with IC+MRE |
| Proximal Small Bowel (N=98) | 56/98 (57%)          | 42/98 (43%) | 32/42 (76%)               | 10/42 (24%)        | --                | --                   | --                    | --                    |
| Terminal Ileum (N=90)       | 44/90 (49%)          | 46/90 (51%) | 4/46 (9%)                 | 2/46 (4%)          | 4/46 (9%)         | 24/46 (52%)          | 8/46 (17%)            | 4/46 (9%)             |
| Colon (N=88)                | 71/88 (81%)          | 17/88 (19%) | 7/17 (41%)                | --                 | 10/17 (59%)       | --                   | --                    | --                    |

CE, capsule endoscopy; IC, ileocolonoscopy; MRE, magnetic resonance enterography  
 \*Comparison of CE and MRE in the proximal small bowel; CE MRE, and IC or combination of two modalities in the terminal ileum; comparison of CE and IC in the colon.

†When the interpretation of the Lewis Score disagreed with the interpretation of the MaRIA score, consensus panel members evaluated capsule endoscope and MRE images in consensus, with their consensus agreement constituting the reference standard in cases of disagreement.

**Supplemental Table 6.** Summary of adverse events per event and per subject

|                                                                      | Enrolled (N=119) |
|----------------------------------------------------------------------|------------------|
| Total subjects $\geq$ 1 AEs, N                                       | 16               |
| Total number of AEs, N                                               | 21               |
| Total Mild/Moderate AEs, N                                           | 14               |
| Total SAEs, N                                                        | 7                |
| <i>Abdominal Pain</i>                                                | 1                |
| <i>CD flare</i>                                                      | 2                |
| <i>Exacerbation of CD</i>                                            | 1                |
| <i>Clostridium difficile</i>                                         | 1                |
| <i>Serum sickness</i>                                                | 1                |
| <i>Capsule retention</i>                                             | 1                |
| AEs, adverse event; CD, Crohn's disease; SAE, serious adverse events |                  |
